# Supplementary material for: Dams extend the surface water renewal time in inland river basins: A comparative study based on stable isotope data from two different basin
Source: Copernicus journal article supplement (doi:10.5194/hess-2024-277), 2024-10-08
Supplement: Supplementary file [file hess-2024-277-RC2-supplement.pdf]

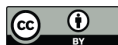

1 **Dams extend the surface water renewal time in inland river**  
2 **basins: A comparative study based on stable isotope data**  
3 **from two different basin**

4 Jiangwei Yang<sup>a,b,c,l</sup>, Liyuan Sang<sup>a,b,d,l</sup>, Guofeng Zhu<sup>a,b,c\*</sup>, Rui Li<sup>a,b,c</sup>, Siyu Lu<sup>a,b,c</sup>, Qingin Wang<sup>a,b,c</sup>,

5 Yinying Jiao<sup>a,b,c</sup>, Xiaoyu Qi<sup>a,b,c</sup>, Zhijie Zheng<sup>a,b,c</sup>, Wenmin Li<sup>a,b,c</sup>, Yuxin Miao<sup>a,b,c</sup>, Yani Gun<sup>a,b,c</sup>

6 <sup>a</sup> College of Geography and Environmental Science, Northwest Normal University, Lanzhou  
7 730070, Gansu, China

8 <sup>b</sup> Shiyang River Ecological Environment Observation Station, Northwest Normal University,  
9 Lanzhou 730070, Gansu, China

10 <sup>c</sup> Key Laboratory of Oasis Resources and Environment and Sustainable Development in Gansu  
11 Province.

12 <sup>d</sup> School of Earth System Science, Tianjin University, Tianjin 300110, China

13 <sup>l</sup> These authors contributed equally to this work and should be considered as co-first authors

14 \*Correspondence to: Guofeng Zhu (zhugf@nwnu.edu.cn)

15 **Abstract**

16 The dramatic increase in the number of dams on rivers in recent years have led to  
17 a more complicated water circulation mechanism in arid regions; Capturing the  
18 impact of dams on water circulation processes is an ongoing challenge in the  
19 hydrology field. By utilizing observational isotopic data from water bodies, we  
20 conducted a comparative study on the Fyw and MTT in two inland river basins within  
21 the arid zone of Central Asia. Research findings suggest that dams amplify the  
22 damping effect and phase shift of seasonal fluctuations in river water, which in turn

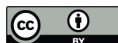

23 extends the water circulation period within inland river basins. The cascading  
24 interception of river water by dams has substantially reduced the proportion of young  
25 water (Fyw) in the river and has nearly tripled the mean transit time (MTT) of river  
26 water. This work confirms the fact that dams are profoundly influencing the water  
27 circulation processes in inland river basins from an isotopic kinetic perspective, and is  
28 useful for understanding the mechanisms driving water circulation times arid areas.

29 **Key Words:** Inland river basin; Arid areas; Dams; Water renewal time; Climate  
30 change

## 31 1. Introduction

32 Sustainable development, whether at the regional or global scale, depends on  
33 effective water resource management (Garrick et al., 2017; Chiang et al., 2021). Over  
34 the past 50 years, most researches have been devoted to using water transit times to  
35 reveal basin-scale water circulation times, functions and the sensitivity of basin  
36 hydrological systems to environmental variables (McGuire and McDonnell, 2006;  
37 Gudmundsson et al., 2021; Gies, 2022). This is important for improving the efficiency  
38 of water resources management in basins, especially given the impact of the unknown  
39 variable of human activities (Cooley et al., 2021). As an essential component of the  
40 water circulation in a basin, the water transit time can reveal the time scale of the  
41 renewal of a water body (Hrachowitz et al., 2009). It not only reflects the  
42 transformation of water bodies between input (precipitation) and output (runoff) in the  
43 study basin, but also allows assessing the impact of anthropogenic interventions on  
44 the natural processes of basin hydrology (Hrachowitz et al., 2010). Due to the



45 complex hydrological mechanism and insufficient observation conditions, the  
46 research on water transit time in arid regions is currently imperfect (Zhu et al., 2021;  
47 Rosa et al., 2020; Yao et al., 2023). Therefore, it is necessary to get an in-depth  
48 knowledge of the water transit time and the water circulation mechanism in arid  
49 regions, so as to improve our understanding of the water transit times and dominant  
50 factors affecting the hydrologic response at the watershed scale.

51 As effective tracers of the environment, hydrogen and oxygen stable isotopes in  
52 water can identify runoff sources and hydrologic flow path through the coupling with  
53 basin climatic and hydrological properties and explain the spatial and temporal  
54 variability of basin hydrological processes (Kim et al., 2016; Kirchner, 2016). Water  
55 transit times are usually described by metrics such as the  $F_{yw}$  and mean transit times  
56 (MTTs), etc. (W. Kirchner, 2015; Stockinger et al., 2016). The  $F_{yw}$  and MTTs are  
57 basic metrics that describe the hydrological function of a catchment and provide  
58 important clues for guiding regional water resources management (Hu et al., 2020). A  
59 study in 2016 calculated the  $F_{yw}$  in hundreds of catchments around the world and  
60 found that nearly a third of the world's rivers are less than three months old (Jasechko  
61 et al., 2016). Catchment characteristics profoundly influence the changes in  $F_{yw}$   
62 (Campbell et al., 2020). It has been noted that the natural features of a catchment,  
63 such as vegetation cover and drainage area, can cause changes in  $F_{yw}$  (Ceperley et al.,  
64 2020). In addition, arid and semi-arid catchments typically respond slowly to  
65 precipitation events and show low  $F_{yw}$  in the direct hydrological response (Kingsbury  
66 et al., 2017). There are a number of factors influencing the water transit times

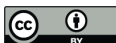

67 (Cartwright et al., 2020). At high altitudes with seasonally cold climates, precipitation  
68 is temporarily stored in the snow during the winter, resulting in longer water transit  
69 times (Lyon et al., 2010). In addition to the natural factors mentioned above, dams  
70 also profoundly influence the water transit times (Weiler et al., 2003). The observation  
71 systems established in previous studies often failed to take control of the entire basin  
72 and failed to provide insights into the interference of dams on hydrological processes  
73 in the basin (Seeger and Weiler, 2014; Zhang et al., 2012). Therefore, this study also  
74 introduces a highly accurate, full-coverage, all-factor monitoring system and explores  
75 the possible impact of dams on the water transit time of the basin.

76 Here we compared water transit times in two basins in the central arid zone of  
77 Asia to (a) analyse water transit times in different inland river basins and their driving  
78 mechanisms; (b) identify the main factors influencing water transit times; and (c) gain  
79 an accurate understanding of hydrological processes in arid zones and their response  
80 mechanisms to dams. Our study can help identify the impact of dams on the  
81 hydrological processes in specific regions or watersheds, thereby enhancing our  
82 understanding of human-induced disruptions to river systems in arid zones.

## 83 2. Study area

84 The Shiyang River Basin (101°22'-104°04'E, 37°07'-39°27'N) is an inland river  
85 basin in the Central Asian arid zone, with intensive human activity and complex  
86 hydrological characteristics in the region, and facing serious challenges in water  
87 resources management and development (Zhu et al., 2018). Two sub-basins (Fig. 1),  
88 the Xiyang River Basin and the Binggou River Basin, located in its upper reaches,

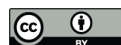

89 were selected as comparative study areas. The Xiyang River basin (37°28'-38°02'N or  
90 101°40'-102°23'E) is at an elevation of 1873-4911m and a basin area of 1727.5 km<sup>2</sup>,  
91 which is characterised by strong solar radiation, abundant sunshine, vigorous  
92 evaporation and large temperature differences between day and night (Sang et al.,  
93 2022). The average annual precipitation in the basin is 281.2 mm and the average  
94 annual evaporation is as high as 1133.4 mm. The river's average annual water output  
95 is  $3.18 \times 10^8$  m<sup>3</sup>, accounting for about 22.3% of the average annual runoff of the  
96 Shiyang River. By 2021, there are 13 dams built in the basin, including multi-stage  
97 dams and large and medium-sized reservoir dams (Zhu et al., 2021).

98 The Binggou River basin (102°107'-102°31'52'E, 37°34'-37°47'N) has a  
99 temperate continental climate, with an average basin temperature of 3.5 °C, annual  
100 precipitation of 400-600 mm and annual evaporation of 800 mm. The river is 45 km  
101 long, with an area of 335 km<sup>2</sup>. The river has an average annual runoff of  $1.47 \times 10^8$  m<sup>3</sup>,  
102 accounting for 10.3% of the average annual runoff of the Shiyang River. By 2021,  
103 only one reservoir dam has been constructed in the basin, the Nanying Reservoir (Zhu  
104 et al., 2018).

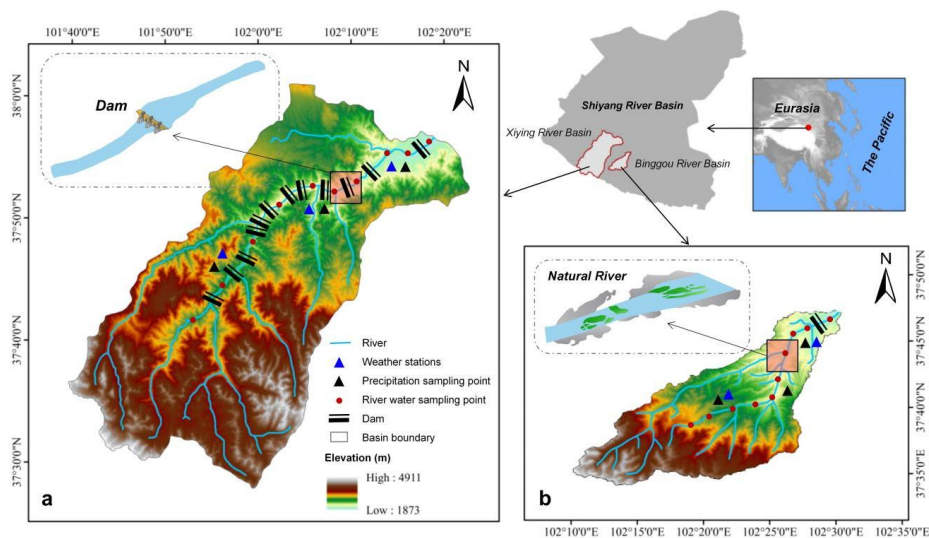

105

106 **Fig. 1 Overview of the study area. (a) Xiyong River basin and distribution of sampling sites.**

107 **(b) Binggou River basin and distribution of sampling sites.**

### 108 3. Materials and methods

#### 109 3.1 Sampling and laboratory analysis

110 From April 2015 to October 2020, we collected 405 surface water samples in the  
 111 Xiyong River and 277 surface water samples in the Binggou River. Three precipitation  
 112 sampling sites were established in Xiyong River and Binggou River respectively, and  
 113 we collected a total of 784 precipitation samples. Automatic weather stations are used  
 114 to record meteorological parameters such as temperature and relative humidity (Table  
 115 1).

116 **Table 1 Basic data for sampling sites**

| Types of sampling points | Abbreviations                                                                                                                                                                                                                                                                       | Numbers | Sampling frequency   | Acquisition methods    |
|--------------------------|-------------------------------------------------------------------------------------------------------------------------------------------------------------------------------------------------------------------------------------------------------------------------------------|---------|----------------------|------------------------|
| Precipitation            | P <sub>1</sub> , P <sub>2</sub> , P <sub>3</sub> , P <sub>4</sub> , P <sub>5</sub> ,<br>P <sub>6</sub>                                                                                                                                                                              | 784     | Precipitation events | Rain gauge collection  |
| River water              | X <sub>1</sub> , X <sub>2</sub> , X <sub>3</sub> , X <sub>4</sub> , X <sub>5</sub> , X <sub>6</sub> , X <sub>7</sub> , X <sub>8</sub> ,<br>X <sub>9</sub> , X <sub>10</sub> , B <sub>1</sub> , B <sub>2</sub> , B <sub>3</sub> , B <sub>4</sub> , B <sub>5</sub> , B <sub>6</sub> , | 682     | Weekly               | Surface water sampling |



---

B7, B8, B9, B10,

---

117 Surface water samples were stored in high-density polyethylene (HDPE) bottles.  
118 Precipitation samples were collected with standard funnels at meteorological stations.  
119 In order to prevent evaporation and leakage of samples during transport and storage,  
120 all bottle openings were sealed with plastic tape and then frozen. All the water  
121 samples collected were tested by a liquid water isotope analyzer (dlt-100, Los Gatos  
122 Research, USA) in the Stable Isotope Laboratory of Northwest Normal University. In  
123 order to ensure the accuracy of the measurements, a duplicate sample was collected  
124 for each sample, and the average value of the two was taken as the final value. The  
125 isotope analysis results are expressed with the notation “ $\delta$ ” and relative to Vienna  
126 Standard Mean Ocean Water (V-SMOW):

$$127 \quad \delta_{\text{sample}}(\text{‰}) = \left[ \left( \frac{R_{\text{sample}}}{R_{\text{v-smow}}} \right) - 1 \right] \times 1000 \quad (1)$$

128 where  $R_{\text{sample}}$  is the ratio of  $^{18}\text{O}/^{16}\text{O}$  or  $^2\text{H}/^1\text{H}$  in the samples and  $R_{\text{standard}}$  is the  
129 ratio of  $^{18}\text{O}/^{16}\text{O}$  or  $^2\text{H}/^1\text{H}$  in V-SMOW. The precision was  $\pm 0.6\text{‰}$  for  $\delta^2\text{H}$  and  $\pm 0.2\text{‰}$   
130 for  $\delta^{18}\text{O}$ .

## 131 3.2 Methods

### 132 3.2.1 Young water fractions ( $F_{\text{yw}}$ )

133 The variation of the isotopic composition of precipitation is seasonal (Campbell  
134 et al., 2020). The damping and phase shift of this seasonal cycle as it is transmitted  
135 through catchments can be used to infer timescales of catchment storage and transport.  
136 Using this principle, Kirchner (2016) developed a method to calculate the  $F_{\text{yw}}$  in  
137 heterogeneous and nonstationary catchments, and we calculated  $F_{\text{yw}}$  for each



138 catchment using this method (~~Kirchner, 2016~~). First, we performed Fourier curve  
139 fitting on the  $\delta^{18}\text{O}$  (‰) time series to determine the cosine and sine coefficients of the  
140 precipitation and river water:

$$141 \quad C_p(t) = a_p \cos(2\pi ft) + b_p \sin(2\pi ft) + K_p \quad (2)$$

$$142 \quad C_s(t) = a_s \cos(2\pi ft) + b_s \sin(2\pi ft) + K_s \quad (3)$$

143 where  $C_p(t)$  is the  $\delta^{18}\text{O}$  (‰) compositions of the precipitation and  $C_s(t)$  is the  
144  $\delta^{18}\text{O}$  (‰) compositions of the streamflow.  $k_p$  and  $k_s$  are the vertical shifts of the fitted  
145 sine waves,  $f$  is the frequency of the annual fluctuations (set to 1/365 days),  $t$  is the  
146 time in days after the start of the sampling period, and  $a_p$ ,  $b_p$ ,  $a_s$ , and  $b_s$  are coefficients  
147 for determining the amplitude and phase shift of the seasonal  $\delta^{18}\text{O}$  cycles (Hu et al.,  
148 2020):

$$149 \quad A_p = \sqrt{a_p^2 + b_p^2}, A_s = \sqrt{a_s^2 + b_s^2} \quad (4)$$

$$150 \quad \varphi_p = \arctan(b_p/a_p), \varphi_s = \arctan(b_s/a_s) \quad (5)$$

151 where  $A_p$  and  $A_s$  are the amplitudes of the precipitation and streamflow,  
152 respectively, and  $\varphi_p$  and  $\varphi_s$  are the phase shifts of the precipitation and streamflow,  
153 respectively. Then  $F_{yw}$  equals the amplitude ratio  $A_s/A_p$ , and the threshold age for  $F_{yw}$   
154 is 0.189 years (69 days) .

### 155 3.2.2 Mean transit times (MTT)

156 After the quality control of the data, we quantified the MTT for the two basins.  
157 We used the MTT to describe the average water transit times and analyzed the effect  
158 of dams on the water transit times.

159 Assuming that the distribution of water transit time in the basin conforms to the





160 gamma distribution function, the transit time distribution (TTD) in the basin can be  
161 computationally expressed as (Hrachowitz et al., 2011) :

$$162 \quad g(\tau) = \frac{\tau^{\alpha-1}}{\beta^\alpha \Gamma(\alpha)} \exp^{-\tau/\beta} = \frac{\tau^{\alpha-1}}{(\bar{\tau}/\alpha)^\alpha \Gamma(\alpha)} e^{-\alpha\tau/\bar{\tau}} \quad (6)$$

163 Where  $\tau$  is the transit time, and  $\tau = \alpha\beta$  is the mean transit time.

$$164 \quad \alpha\beta = \tau \quad (7)$$

165 Where  $\alpha$  and  $\beta$  are a shape factor and scale factor<sup>43</sup>, respectively.

### 166 3.2.3 Uncertainty analysis of model

167 A 4-year warm-up period was set for the model. Uncertainty was estimated using  
168 generalized likelihood uncertainty estimation (GLUE) (Heidbüchel et al., 2012). The  
169 Nash–Sutcliffe Efficiency (NSE) ensured that temporal stream isotope dynamics were  
170 adequately captured (Harman, 2015).

## 171 4. Results

### 172 4.1 The isotopic characteristics of the precipitation and the river water

173 Throughout the sampling period, precipitation stable hydrogen and oxygen  
174 isotope values showed significant seasonal variation, being most enriched in summer  
175 and most depleted in winter. However, the seasonal variation of precipitation isotope  
176 values in the Binggou River basin showed greater variability than in the Xiying River  
177 basin (Fig. 2). The local meteoric water line (LMWL) in the Xiying River basin is:  $\delta D$   
178  $= 7.51\delta^{18}O + 10.04$  ( $R^2 = 0.96$ ,  $P < 0.01$ ), and the LMWL in the Binggou River basin  
179 is:  $\delta D = 7.75\delta^{18}O + 10.98$  ( $R^2 = 0.91$ ,  $P < 0.01$ ). The slope of the LMWL in the two  
180 basins is lower than the global meteoric water line (Table 2), indicating that this  
181 region is in the arid zone, which is less disturbed by precipitation and strongly



182 differentiated by evapotranspiration. Specifically, the slope and intercept of the  
183 LMWL in the Xiyang River basin are lower than those of the Binggou River, showing  
184 a greater evaporative enrichment effect than the Binggou River.

185 In contrast, the slope of the fitted H-O isotope curve for river water is much  
186 lower than that of the LMWL, suggesting that the region experienced intense  
187 evaporation, resulting in a higher enrichment of stable hydrogen-oxygen isotopes in  
188 river water (Fig. 2). This indirectly confirms the climatic characteristics of intense  
189 evaporation in inland river basins. Also, the variability of stable hydrogen-oxygen  
190 isotope values in river water is smaller than that of precipitation, but inherits well the  
191 variability characteristics of precipitation isotopes (Fig. 2). The isotopic values of  
192 river water in the Xiyang River basin showed a trend of gradual enrichment from  
193 upstream to downstream. The isotopic values of the river water near the dams are  
194 particularly enriched (Fig. S1). In contrast, there is no clear phenomenon of gradual  
195 enrichment from upstream to downstream in the isotopic values of river water in the  
196 Binggou River basin (Fig. S1).

197 **Table 2 Isotopic values of different water bodies in different spatial zones of the Shiyang**  
198 **River.**

| Sampling Type                      | Values of $\delta^{18}\text{O}$ (‰) |      |       | Water line equation                                 |
|------------------------------------|-------------------------------------|------|-------|-----------------------------------------------------|
|                                    | Min.                                | Max. | Mean. |                                                     |
| Precipitation in the Xiyang River  | -9.0                                | 15.2 | -31.1 | $\delta\text{D} = 7.51 \delta^{18}\text{O} + 10.04$ |
| Surface water of the Xiyang River  | -8.1                                | -5.6 | -8.6  | $\delta\text{D} = 6.59 \delta^{18}\text{O} + 4.95$  |
| Precipitation in the Binggou River | -9.3                                | 7.3  | -28.9 | $\delta\text{D} = 7.75 \delta^{18}\text{O} + 10.98$ |
| Surface water of the Binggou River | -8.6                                | -4.6 | -10.7 | $\delta\text{D} = 6.68 \delta^{18}\text{O} + 6.10$  |



199

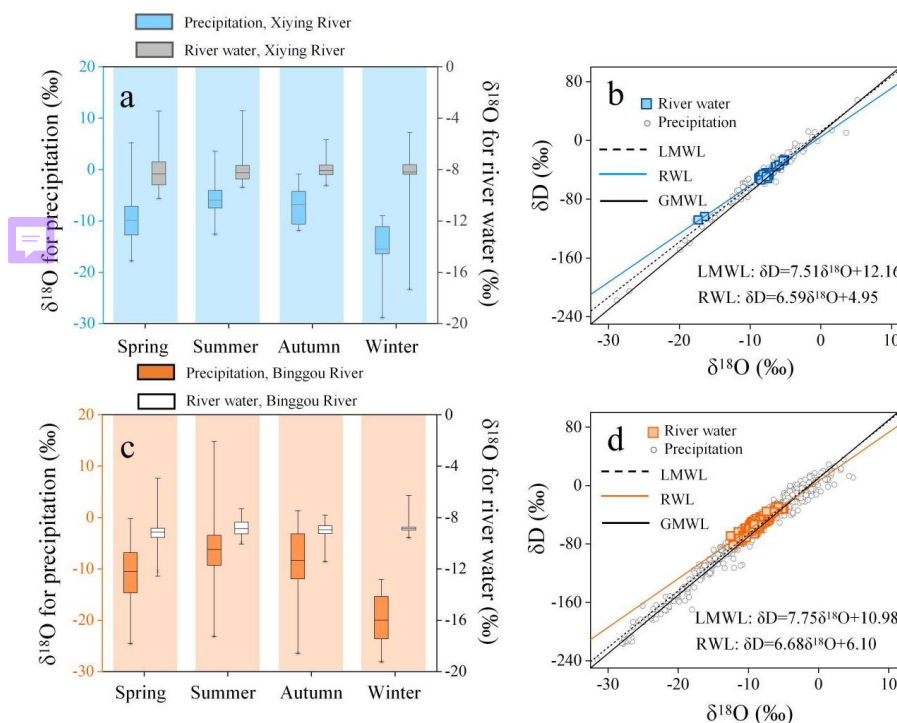

200

201 **Fig. 2 Isotopic value characteristics and the relationship between  $\delta\text{D}$  and  $\delta^{18}\text{O}$  for the**  
 202 **precipitation and the river water. (a) for the Xiyiing River basin and (b) for the Binggou**  
 203 **River basin. RWL is an abbreviation for river water line and LMWL is an abbreviation for**  
 204 **local meteoric water line**

205 4.2 Variation of  $\delta^{18}\text{O}$  in the precipitation and the river water

206 We compared the time series variation of the isotopic composition of  
 207 precipitation and the isotopic composition of river water in these two basins. The  
 208 time-series variation in the isotopic composition of precipitation is large for the two  
 209 basins (Fig. 3). Precipitation isotope values in the Xiyiing River basin varied between  
 210  $-31.1\text{‰}$  and  $15.2\text{‰}$ , while precipitation isotope values in the Binggou River basin



211 varied between -28.9‰ and 7.3‰ (Table 2). Precipitation isotope values in the Xiyong  
 212 River basin showed greater variability than those in the Binggou River basin. In  
 213 contrast, the amplitude of river water isotopes in both basins has experienced greater  
 214 damping. The isotopic values of river water in the Xiyong River basin varied between  
 215 -8.6‰ and -5.6‰, while the isotopic values of river water in the Binggou River basin  
 216 varied between -10.7‰ and -4.6‰.

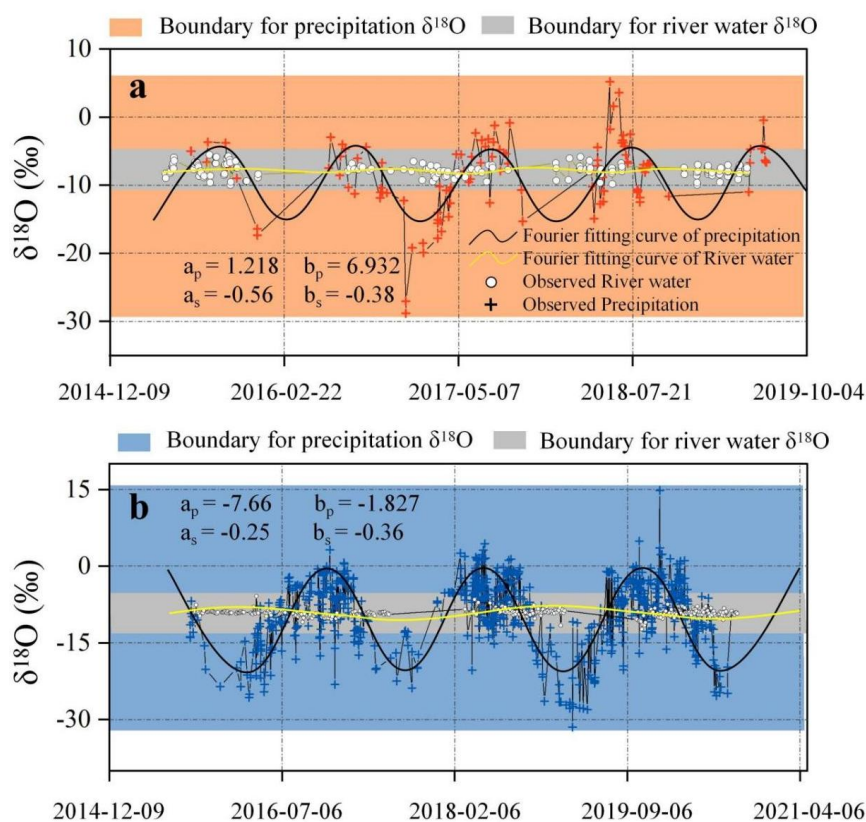

217  
 218 **Fig. 3** Time series variation and Fourier curve fitting of precipitation and the river water in  
 219 two comparison basins,  $a_p$  and  $b_p$  are the coefficients for determining the amplitude of the  
 220 for precipitation,  $a_s$  and  $b_s$  are the coefficients for determining the amplitude for the river  
 221 water. *a* for the Binggou River, *b* for the Xiyong River.



222 We performed a Fourier curve fitting analysis. The Fourier curve fitting models  
223 for precipitation and streamflow were statistically significant ( $p < 0.01$ ). Changes in  
224 river isotopic values were dampened at both sites compared to precipitation (Fig. 3).  
225 Specifically, the variation in river isotopic values in the Binggou River well inherited  
226 the variation in precipitation, while the seasonal signal of river isotope values in the  
227 Xiying River basin had a more significant damping. Stable hydrogen and oxygen  
228 isotope values in the precipitation and the river water show significant differences and  
229 significant seasonal variation. This finding suggests that in the Xi Ying River Basin,  
230 characterized by a dense distribution of dams, the surface water demonstrates a  
231 complex interplay of processes including isotope dilution, enrichment, and  
232 attenuation.

## 233 **5. Discussions**

### 234 5.1 Dynamics of $F_{yw}$ and MTTs

235 The MTT for the Xiying River basin is 3390 days, which is significantly longer  
236 than the 1170 days for the Binggou River basin (Table 3). As the spatial and temporal  
237 heterogeneity of the basin may cause errors in the MTT estimates, we used  $F_{yw}$  to  
238 constrain the estimated MTT results. This is because  $F_{yw}$  is not affected by changes in  
239 basin characteristics (Zhang et al., 2020). In general, smaller  $F_{yw}$  corresponds to  
240 longer water transit times.

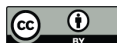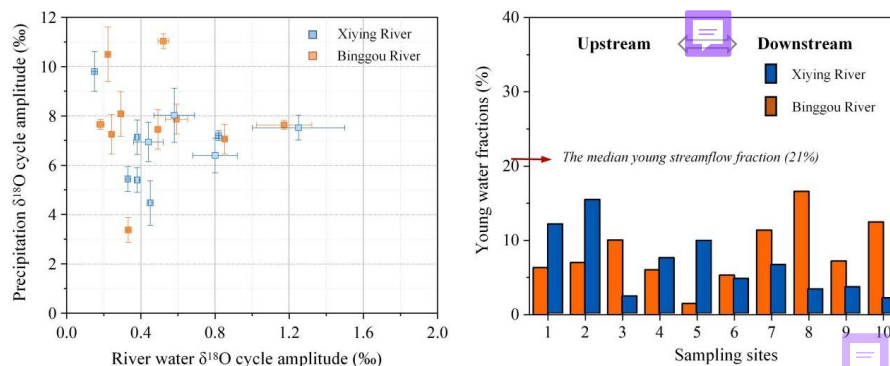

241

242 **Fig. 4** Amplitude of the seasonal cycle of precipitation and river water  $\delta^{18}\text{O}$  (left) and

243 riverine variation of the  $F_{yw}$  in two compared basins (right).

244 **Table 3** Comparison of amplitude, young water fraction ( $F_{yw}$ ) and the mean transit time

245 (MTT) in two basins.

| Basins              | Precipitation Amplitude         | River water amplitude          | Number of dams | MTT  | MTT (95% C.L.) | $F_{yw}$ | $F_{yw}$ (95% C.L.) | NSE  |
|---------------------|---------------------------------|--------------------------------|----------------|------|----------------|----------|---------------------|------|
| Xiying River basin  | $a_p = -7.66$<br>$b_p = -1.827$ | $a_s = -0.25$<br>$b_s = -0.36$ | 13             | 3390 | 2784-3874      | 6.70%    | 2.1%-15.3%          | 0.54 |
| Binggou River basin | $a_p = 1.218$<br>$b_p = 6.932$  | $a_s = -0.56$<br>$b_s = -0.38$ | 1              | 1170 | 1011-1357      | 8.40%    | 1.5%-16.6%          | 0.62 |

246 We found that the  $F_{yw}$  in the Xiying River basin decreases from upstream to

247 downstream (Fig. 4). Reaching the outlet of the river, the  $F_{yw}$  of the river is even less

248 than 3%. However, there is no significant decrease in the variation of the  $F_{yw}$  in the

249 Binggou River. We examined the along-river variation of the  $F_{yw}$  and river isotope

250 values in the two basins and found a significant negative correlation between river

251 isotope composition and young water in the Xiying River basin ( $r = -0.15$ ,  $p < 0.01$ ),

252 while no significant correlation was found in the Binggou River basin (Fig. 5). Thus,

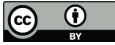

253 the along-river enrichment of river water isotopic values caused by the multi-stage  
254 dams resulted in a significantly lower proportion of the  $F_{yw}$  in the Xiying River river.

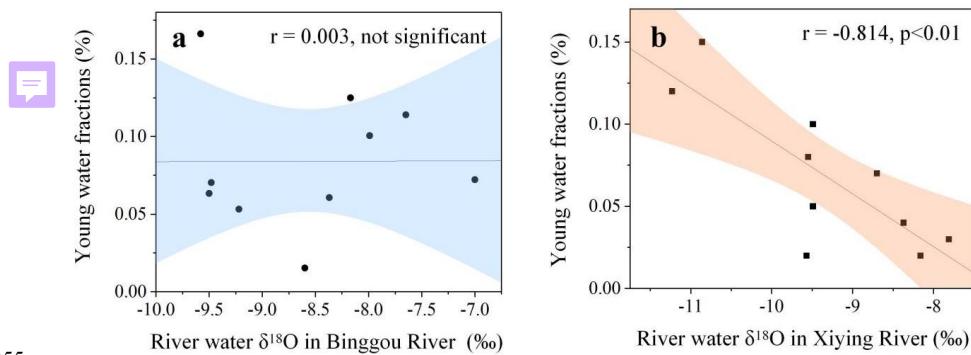

256 **Fig. 5 Correlation between river water  $\delta^{18}\text{O}$  and the young water fractions. *a* for the Binggou**  
257 **River, *b* for the Xiying River.**

## 258 5.2 Impact of dams on the catchment water transit times

259 Many global studies have shown that humans have a significant impact on the  
260 land water circulation through the construction and operation of dams (Lehner et al.,  
261 2011). Compared with free-flowing rivers, rivers affected by dams have higher  
262 evaporation losses, especially in arid and semi-arid regions. All runoff in the entire  
263 Xiying River Basin was affected by dams (Wang et al., 2019). Due to abundant water  
264 energy, many basins have built multi-stage dams from upstream to midstream. With  
265 the gradual interception of these dams, a cumulative effect is generated. This  
266 cumulative effect leads to a gradual evaporation and enrichment of hydrogen and  
267 oxygen isotopes from the upper reaches to the middle reaches of the river (Fig. 6).

268 The artificially intercepted runoff may experience a considerable delay from the  
269 upstream source area to the estuary, leading to a series of local and downstream water

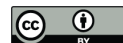

270 system changes (Vorosmarty et al., 1997). The estuaries of several large rivers show  
271 that the continental runoff caused by the reservoirs has aged for more than 3 months  
272 (Voeroesmarty et al., 1997). In a free-flowing river, the average residence time of  
273 continental runoff may be between 16 days and 26 days (Vörösmarty and Sahagian,  
274 2000). In contrast, at the mouth of the 236 large-scale reservoirs, emissions-weighted  
275 global averages have risen by nearly 60 days (Zarfl et al., 2015). Therefore, after the  
276 river water passes through the basin regulated by dams, the time to reach the outlet of  
277 the basin will be greatly extended. Fig. 6 shows the change in water transit times  
278 under the influence of dams. Under the interference of dams on the river, the river  
279 water is continuously blocked, resulting in strong isotope evaporation and enrichment.  
280 This evaporation enrichment phenomenon will produce an isotope evaporation  
281 non-equilibrium fractionation effect, in which the heavy isotopes stay and the light  
282 isotopes continue to flow downstream. As a result, the variability of the seasonal  
283 amplitude of the precipitation isotope is weakened, and the seasonal amplitude of the  
284 isotope of the river water is reduced, resulting in the damping and phase shift of the  
285 river water relative to the seasonal period of the precipitation isotope (Song et al.,  
286 2020; Jodar et al., 2016). The Fourier fitting curve amplitudes of the precipitation  
287 isotopic values in the Xiyang River Basin are -7.661 and -1.827. Under the influence  
288 of dams and the evaporative fractionation effect, the amplitude of the isotope of the  
289 river water reaching the outlet of the basin are only -0.25 and -0.36 (Fig. 3). The  
290 stronger the evaporative enrichment effect caused by dams, the greater this damping  
291 and phase shift, resulting in longer MTTs.





292 We also used changes in river hydrological data to support this conclusion.  
293 Studies have shown that small watersheds are more sensitive to the impact of human  
294 activities such as dams. Fig. S2 shows the average daily water discharge variation  
295 during the peak flood season (June, July and August) in the Xiying River basin. From  
296 1989 to 2019, the peak flow in the Xiying River basin has shown a yearly decreasing  
297 trend in June and July, mainly due to the interception of multi-stage dams reducing  
298 the flow rate of the river. As a result, the natural properties of hydrology are strongly  
299 influenced by dams, and the multi-stage dams extend the water circulation times by  
300 changing links in the hydrological cycle of the basin.

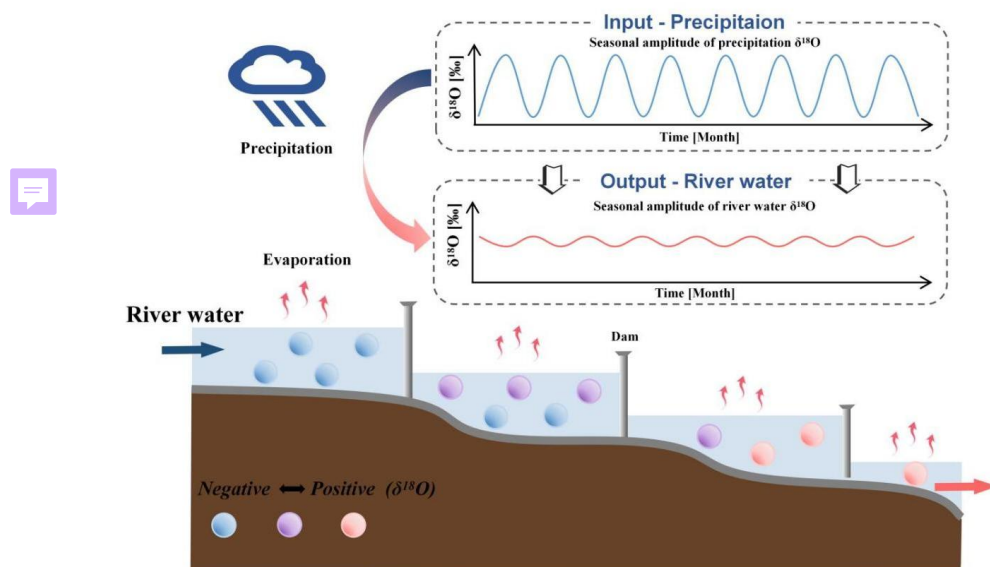

301  
302 **Fig. 6 A conceptual model of the effect of dams on the water circulation processes from the**  
303 **perspective of isotope kinetics. The top right corner shows the seasonal amplitude of the**  
304 **precipitation and the river water.**

305 5.3 Uncertainty analysis of the algorithm



306 The factors contributing to the uncertainty are manifold. Firstly, the time interval  
307 of sampling can seriously affect the uncertainty of the results. Stockinger et al. (2016)  
308 noted that a high sampling frequency would improve the accuracy of the  $F_{yw}$   
309 calculations (Stockinger et al., 2014). The uncertainty in using weekly sampling  
310 method in this study is relatively small. In addition, the choice of the spatial location  
311 of sampling points can also have an impact on the accuracy of the results (Jasechko et  
312 al., 2016). Data errors can also occur because of mismatches in the spatial location of  
313 the chosen sampling types (precipitation, surface water), such as precipitation  
314 sampling points being too far away from stream water sampling points. Ice meltwater  
315 is another important source of stream water recharge in the Shiyang River basin, and  
316 the involvement of glaciers and snow also largely delays the transit time of water,  
317 increasing the uncertainty in the model calculations (Timbe et al., 2014).

318 Uncertainty in MTTs for the two basins were estimated using five years of water  
319 isotope data ( $\delta^{18}\text{O}$ ) from 2015 to 2019. If the NSE result for a group of data is less  
320 than 0.4, the uncertainty in the data is within manageable limits (Hrachowitz et al.,  
321 2009). The results show that the NSE in the Xiyang River basin being the largest (0.54)  
322 and the Binggou River the smallest (0.62). It is undeniable that anthropogenic  
323 disturbances may also add to the uncertainty of the results of studies in the Xiyang  
324 River Basin. As the Xiyang River is one of the most abundant rivers in terms of water  
325 resources and hydrodynamic energy in the upper Shiyang River Basin, multi-stage  
326 dams have been built on the river to regulate the redistribution of water resources.  
327 Dams disturb the natural state of hydrological processes in the basin and therefore



328 lead to uncertainty in the model (Matteau et al., 2009) .

## 329 **6. Conclusions**

330 By utilizing observational isotopic data from water bodies, we conducted a  
331 comparative study on the Fyw and MTT in two inland river basins within the arid  
332 zone of Central Asia. The objective was to quantitatively assess the impact of dams on  
333 water circulation times. Our findings show that the main human factor of long water  
334 circulation times in inland river basins in arid regions is dams. The MTT of Xiying  
335 River Basin is 3380 days, which is longer than the Binggou River basin (1170 days).  
336 The multi-stage dams resulted in a significant decrease in the young water fraction of  
337 the river, leading to longer MTT. The analysis shows that dams increasing the  
338 damping and phase shift of seasonal amplitude of river water relative to precipitation  
339 isotopes. Therefore, it leads to longer water circulation times in inland river basins.  
340 This work have used mathematical and computational methods to assess the water  
341 circulation times. Although uncertainties exist, we have tried to minimize them by  
342 establishing a highly accurate and comprehensive isotope monitoring network and  
343 optimizing the location of the precipitation and surface water sampling points, The  
344 study confirms the fact that dams are profoundly influencing the water circulation  
345 processes in inland river basins from an isotopic kinetic perspective, and is useful for  
346 understanding the mechanisms driving water circulation times globally.

## 347 **Acknowledgments**

348 This research was financially supported by the National Natural Science  
349 Foundation of China(41971036, 42371040), the Key Natural Science Foundation of

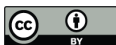

350 Gansu Province(23JRRA698), the Key Research and Development Program of Gansu  
351 Province(22YF7NA122), the Cultivation Program of Major key projects of Northwest  
352 Normal University(NWNU-LKZD-202302), the Oasis Scientific Research  
353 achievements Breakthrough Action Plan Project of Northwest Normal  
354 University(NWNU-LZKX-202303).

### 355 **Data Availability Statement**

356 The data that support the findings of this study are openly available in Zhu (2021)  
357 at “Data sets of Stable water isotope monitoring network of different water bodies in  
358 Shiyang River Basin, a typical arid river in China”, Mendeley Data, V1, doi: 10.1763  
359 2/t87pm4b5dx.1.

### 360 **Author contributions statement**

361 Jiangwei Yang and Liyuan Sang: Writing-Original draft preparation; Xiaoyu  
362 Qi,Zhijie Zheng and Yingying Jiao: Visualization; Siyu Lu, Wenmin Li and Rui Li:  
363 Investigation; Guofeng Zhu: Supervision; Qinqin Wang, Yuxin Miao and Yani Gun:  
364 Software.

### 365 **Declaration of Interest Statement**

366 We undersigned declare that this manuscript entitled “Dams extend the surface  
367 water renewal time in inland river basins: A comparative study based on stable isotope  
368 data from two different basin” is original, and has not been published before and is  
369 not currently being considered for publication elsewhere.

370 The authors declare that they have no known competing financial interests or  
371 personal relationships that could have appeared to influence the work reported in this  
372 paper.

### 373 **References**



- 374 Campbell, É.M.S., Pavlovskii, I. and Ryan, M.C., 2020. Snowpack disrupts  
375 relationship between young water fraction and isotope amplitude ratio;  
376 approximately one fifth of mountain streamflow less than one year old.  
377 Hydrological Processes, 34(25): 4762-4775.
- 378 Cartwright, I. et al., 2020. The variation and controls of mean transit times in  
379 Australian headwater catchments. Hydrological Processes, 34(21): 4034-4048.
- 380 Ceperley, N. et al., 2020. Seasonal snow cover decreases young water fractions in  
381 high Alpine catchments. Hydrological Processes, 34(25): 4794-4813.
- 382 Chiang, F., Mazdiyasi, O. and AghaKouchak, A., 2021. Evidence of anthropogenic  
383 impacts on global drought frequency, duration, and intensity. Nat Commun,  
384 12(1): 2754.
- 385 Cooley, S.W., Ryan, J.C. and Smith, L.C., 2021. Human alteration of global surface  
386 water storage variability. Nature (London), 591(7848): 78-81.
- 387 Garrick, D.E. et al., 2017. Valuing water for sustainable development. Science,  
388 358(6366): 1003-1005.
- 389 Gies, E., 2022. Smarter ways with water. Nature, 611(7936): S12-S14.
- 390 Gudmundsson, L. et al., 2021. Globally observed trends in mean and extreme river  
391 flow attributed to climate change. Science, 371(6534): 1159-1162.
- 392 Harman, C.J., 2015. Time-variable transit time distributions and transport: Theory and  
393 application to storage-dependent transport of chloride in a watershed. Water  
394 Resources Research, 51(1): 1-30.
- 395 Heidbüchel, I., Troch, P.A., Lyon, S.W. and Weiler, M., 2012. The master transit time



396 distribution of variable flow systems. *Water Resources Research*, 48(6).

397 Hrachowitz, M. et al., 2009. Using long-term data sets to understand transit times in  
398 contrasting headwater catchments. *Journal of Hydrology*, 367(3-4): 237-248.

399 Hrachowitz, M., Soulsby, C., Tetzlaff, D. and Malcolm, I.A., 2011. Sensitivity of  
400 mean transit time estimates to model conditioning and data availability.  
401 *Hydrological Processes*, 25(6): 980-990.

402 Hrachowitz, M., Soulsby, C., Tetzlaff, D. and Speed, M., 2010. Catchment transit  
403 times and landscape controls-does scale matter? *Hydrological Processes*, 24(1):  
404 117-125.

405 Hrachowitz, M., Soulsby, C., Tetzlaff, D., Dawson, J. and Malcolm, I.A., 2009.  
406 Regionalization of transit time estimates in montane catchments by integrating  
407 landscape controls. *Water Resources Research*, 45(5): 207-213.

408 Hu, M. et al., 2020. Assessment of streamflow components and hydrologic transit  
409 times using stable isotopes of oxygen and hydrogen in waters of a subtropical  
410 watershed in eastern China. *Journal of Hydrology*, 589: 125363.

411 Jasechko, S., Kirchner, J.W., Welker, J.M. and McDonnell, J.J., 2016. Substantial  
412 proportion of global streamflow less than three months old. *Nature geoscience*,  
413 9(2): 126-129.

414 Jodar, J. et al., 2016. Vertical variation in the amplitude of the seasonal isotopic  
415 content of rainfall as a tool to jointly estimate the groundwater recharge zone and  
416 transit times in the Ordesa and Monte Perdido National Park aquifer system,  
417 north-eastern Spain. *Science of the Total Environment*, 573(dec.15): 505-517.



- 418 Kim, M. et al., 2016. Transit time distributions and StorAge Selection functions in a  
419 sloping soil lysimeter with time-varying flow paths: Direct observation of  
420 internal and external transport variability. *Water Resources Research*, 52(9):  
421 7105-7129.
- 422 Kingsbury, J.A., Barlow, J.R.B., Jurgens, B.C., McMahon, P.B. and Carmichael, J.K.,  
423 2017. Fraction of young water as an indicator of aquifer vulnerability along two  
424 regional flow paths in the Mississippi embayment aquifer system, southeastern  
425 USA. *Hydrogeology Journal*, 25(6): 1661-1678.
- 426 Kirchner, J.W., 2016. Aggregation in environmental systems – Part 2: Catchment  
427 mean transit times and young water fractions under hydrologic nonstationarity.  
428 *Hydrology and Earth System Sciences*, 20(1): 299-328.
- 429 Lehner, B. et al., 2011. High-resolution mapping of the world's reservoirs and dams  
430 for sustainable river-flow management. *Frontiers in Ecology & the Environment*,  
431 9(9): 494-502.
- 432 Lyon, S.W. et al., 2010. Controls on snowmelt water mean transit times in northern  
433 boreal catchments. *Hydrological Processes*, 24(12): 1672-1684.
- 434 Matteau, M., Assani, A.A. and Mesfioui, M., 2009. Application of multivariate  
435 statistical analysis methods to the dam hydrologic impact studies. *Journal of*  
436 *hydrology (Amsterdam)*, 371(1): 120-128.
- 437 McGuire, K.J. and McDonnell, J.J., 2006. A review and evaluation of catchment  
438 transit time modeling. *Journal of Hydrology*, 330(3-4): 543-563.
- 439 Rosa, L., Chiarelli, D.D., Rulli, M.C., Dell Angelo, J. and D Odorico, P., 2020. Global

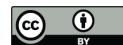

- 440 agricultural economic water scarcity. *Science Advances*, 6(18).
- 441 Sang, L. et al., 2022. Spatial variability of runoff recharge sources and influence  
442 mechanisms in an arid mountain flow-producing zone. *Hydrological processes*,  
443 36(8): n/a-n/a.
- 444 Seeger, S. and Weiler, M., 2014. Reevaluation of transit time distributions, mean  
445 transit times and their relation to catchment topography. *Hydrology and Earth  
446 System Sciences*, 18(12): 4751-4771.
- 447 Song, X. et al., 2020. River Dynamics Control Transit Time Distributions and  
448 Biogeochemical Reactions in a Dam-Regulated River Corridor. *Water resources  
449 research*, 56(9): n/a-n/a.
- 450 Stockinger, M.P. et al., 2014. Seasonal soil moisture patterns: Controlling transit time  
451 distributions in a forested headwater catchment. *Water Resources Research*,  
452 50(6): 5270-5289.
- 453 Stockinger, M.P. et al., 2016. Tracer sampling frequency influences estimates of  
454 young water fraction and streamwater transit time distribution. *Journal of  
455 Hydrology*, 541: 952-964.
- 456 Timbe, E. et al., 2014. Understanding uncertainties when inferring mean transit times  
457 of water through tracer-based lumped-parameter models in Andean tropical  
458 montane cloud forest catchments. *Hydrology and Earth System Sciences*, 18(4):  
459 1503-1523.
- 460 Voeroversmarty, C.J. et al., 1997. The storage and aging of continental runoff in large  
461 reservoir systems of the world. *Ambio*, 26(4): 210-219.





- 462 Vörösmarty, C.J. and Sahagian, D., 2000. Anthropogenic Disturbance of the  
463 Terrestrial Water Cycle. *Bioscience*, 50(9): 753-765.
- 464 Vorosmarty, C.J., Meybeck, M., Fekete, B. and Sharma, K., 1997. The potential  
465 impact of neo-Castorization on sediment transport by the global network of  
466 rivers. *iahs publication*.
- 467 W. Kirchner, J., 2015. Aggregation in environmental systems: seasonal tracer cycles  
468 quantify young water fractions, but not mean transit times, in spatially  
469 heterogeneous catchments. *Hydrology and earth system sciences discussions*,  
470 12(3): 3059-3103.
- 471 Wang, B., Zhang, H., Liang, X., Li, X. and Wang, F., 2019. Cumulative effects of  
472 multi-stage dams on river water cycle: Evidence from hydrogen and oxygen  
473 isotopes. *Journal of Hydrology*, 568: 604-610.
- 474 Weiler, M., McGlynn, B.L., McGuire, K.J. and McDonnell, J.J., 2003. How does  
475 rainfall become runoff? A combined tracer and runoff transfer function approach.  
476 *Water Resources Research*, 39(11).
- 477 Yao, F. et al., 2023. Satellites reveal widespread decline in global lake water storage.  
478 *Science*, 380(6646): 743-749.
- 479 Zarfl, C., Lumsdon, A.E., Berlekamp, J., Tydecks, L. and Tockner, K., 2015. A global  
480 boom in hydropower dam construction. *Aquatic sciences*, 77(1): 161-170.
- 481 Zhang, N. et al., 2012. Influence of Reservoir Operation in the Upper Reaches of the  
482 Yangtze River (China) on the Inflow and Outflow Regime of the TGR-based on  
483 the Improved SWAT Model. *Water Resources Management*, 26(3): 691-705.

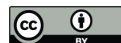

- 484 Zhang, Z., Chen, X., Cheng, Q. and Soulsby, C., 2020. Characterizing the variability  
485 of transit time distributions and young water fractions in karst catchments using  
486 flux tracking. *Hydrological Processes*, 34(15): 3156-3174.
- 487 Zhu, G. et al., 2021. Impact of landscape dams on river water circulation in urban and  
488 peri-urban areas in the Shiyang River Basin: Evidence obtained from hydrogen  
489 and oxygen isotopes. *Journal of hydrology (Amsterdam)*, 602: 126779.
- 490 Zhu, G., Guo, H., Qin, D., Pan, H. and Ma, X., 2018. Contribution of recycled  
491 moisture to precipitation in the monsoon marginal zone: Estimate based on stable  
492 isotope data. *Journal of Hydrology*, 569.
